# Supplementary material for: Current Status of Vector-Borne Diseases in Croatia: Challenges and Future Prospects
Source: MDPI journal article supplement (doi:10.3390/life13091856), 2023-09-01
Supplement: s1 [file s1]

**Table S1.** Sampling sites of *Ixodes ricinus* (Linnaeus, 1758) in Croatia.

| Locality                       | Altitude-latitude<br>(degree/min/sec) | UTM   |
|--------------------------------|---------------------------------------|-------|
| 1. Bale                        | N 45°02'22" E 13°47'09"               | VK 08 |
| 2. Baćinska jezera             | N 43°04'39" E 17°24'54"               | XH 97 |
| 3. Banjol Island               | N 45°04'21" E 13°36'35"               | UK 99 |
| 4. Batina                      | N 45°50'29" E 18°50'44"               | CR 38 |
| 5. Beli Manastir               | N 45°46' 06" E 18°37' 47"             | CR 17 |
| 6. Bilje                       | N 45°36' 16" E 18°44' 39"             | CR 25 |
| 7. Bidrovec                    | N 45°53' 41" E 16°01' 47"             | WL 77 |
| 8. Bjelovar                    | N 45°53'55" E 16°50'32"               | XL 48 |
| 9. Biograd-Vrana               | N 43°56'09" E 15°26'33"               | WJ 36 |
| 10. Biokovo Mt.                | -                                     | XH 79 |
| 11. Brač Island                | N 43°18'17" E 16°39'09"               | XJ 30 |
| 12. Branjina                   | N 45°49'22" E 18°41'35"               | CR 27 |
| 13. Brijuni                    | N 44°56'20" E 13°40'20"               | VK 07 |
| 14. Budakovac                  | N 45°51'03" E 17°38'16"               | XL 97 |
| 15. Cres Island:<br>Belej      | N 44°46'41" E 14°25'46"               | VK 56 |
| Hrasta                         | N 44°48'50" E 14°25'14"               |       |
| 16. Cres Island:<br>Cres       | N 44°57'38" E 14°24'33"               | VK 57 |
| Vrana                          | N 44°50'40" E 14°26'32"               |       |
| 17. Cres Island:<br>Vodice     | N 45°00'31" E 14°23'58"               | VK 58 |
| 18. Cugovec                    | N 45°54'28" E 16°30'56"               | XL 18 |
| 19. Čakovec                    | N 46°23'24" E 16°26'17"               | XM 13 |
| 20. Čeminac                    | N 45°41'12" E 18°40'6"                | CR 16 |
| 21. Dalj Planina               | N 45°31'09" E 18°57'54"               | CR 00 |
| 22. Dekanovec                  | N 46°26'48" E 16°34'49"               | XM 24 |
| 23. Delnice                    | N 45°23'55" E 14°48'05"               | VL 82 |
| 24. Donje Tihovo               | N 45°25'59" E 14°50'49"               | VL 82 |
| 25. Donji Andrijeveci          | N 45°11'19" E 18°17'50"               | BR 80 |
| 26. Dotrščina                  | N 45°51'06" E 16°01'12"               | WL 77 |
| 27. Draž                       | N 45°50'30" E 18°47' 8"               | CR 27 |
| 28. Duboševica                 | N 45°53'05" E 18°41'46"               | CR 28 |
| 29. Dubrovnik                  | N 42°39'02" E 18°05'40"               | BN 62 |
| 30. Dugo Selo                  | N 45°48'21" E 16°14'16"               | WL 97 |
| 31. Duzluk                     | N 45°30'55" E 17°51'53"               | YL 24 |
| 32. Đakovo                     | N 45°18'25" E 18°25'01"               | BR 92 |
| 33. Erdut                      | N 45°31'29" E 19°03'36"               | CR 44 |
| 34. Figarola Island            | N 45°05'41" E 13°37'17"               | UK 99 |
| 35. Garešnica                  | N 45°34'27" E 16°56'26"               | XL 54 |
| 36. Grabovac                   | N 45°41'42" E 18°44'34"               | CR 26 |
| 37. Grujica Island             | N 44°24'37" E 14°34'09"               | VK 62 |
| 38. Gumance                    | N 45°30'23" E 14°25'02"               | VL 64 |
| 39. Gustinja Island            | N 45°00'59" E 13°40'53"               | UK 99 |
| 40. Haljevo (Beli<br>Manastir) | N 45°44'27" E 18°36'42"               | CR 16 |

|                                   |                           |       |
|-----------------------------------|---------------------------|-------|
| 41. Haljevo (Darda)               | N 45°37'30" E 18°41'21"   | CR 25 |
| 42. Ilovik Island                 | N 44°27'09" E 14°33'05"   | VK 62 |
| 43. Ivanovo Selo                  | N 45°40'25" E 17°15'02"   | XL 76 |
| 44. Kalnik                        | N 46°07'50" E 16°27'16"   | XM 21 |
| 45. Kaštela                       | N 43°33'51" E 16°21'29"   | XJ 02 |
| 46. Koprivnica                    | N 46°09'50" E 16°50'00"   | XM 41 |
| 47. Koška                         | N 45°32'44" E 18°16'59"   | BR 84 |
| 48. Koversada                     | N 45°08'03" E 13°35'51"   | UL 90 |
| 49. Kozjak mountain:<br>Malačka   | N 43°34'44" E 16°21'04"   | XJ 02 |
| 50. Krk Island                    | N 45°00'38" E 14°45'24"   | VK 79 |
| 51. Krndija (ustava)              | N 45°27'48" E 18°23'09"   | BR 93 |
| 52. Kunjevci                      | N 45°13'53" E 18°48'04"   | CR 21 |
| 53. Kurjak reef                   | N 44°24'17" E 14°45'06"   | VK 71 |
| 54. Lakal Island                  | N 45°09'41" E 13°35'33"   | UL 90 |
| 55. Lika: Plitvice-Crna<br>rijeka | N 44°50'41" E 15°37'45"   | WK 46 |
| 56. Lipik                         | N 45°24'51" E 17°09'40"   | XL 63 |
| 57. Lipovljani                    | N 45°23'53" E 16°53'40"   | XL 42 |
| 58. Lošinj Island:<br>Veli Lošinj | N 44°31'09" E 14°30'09"   | VK 63 |
| 59. Lovas                         | N 45°13'34" E 19°10'07"   | CR 50 |
| 60. Lučice, Delnice               | N 45°22' 26" E 14°48' 02" | VL 82 |
| 61. Lug                           | N 45°39'48" E 18°46'26"   | CR 25 |
| 62. Lukovdol- Lipov<br>vrh        | N 45°25'33" E 15°07'37"   | VL 03 |
| 63. Lunga<br>Island               | N 45°08'32" E 13°34'58"   | UL 90 |
| 64. Male Orjule Island            | N 44°29'20" E 14°33'53"   | VK 62 |
| 65. Marija Trošt                  | N 45°25'12" E 14°49'27"   | VL 82 |
| 66. Markovac                      | N 45°25'58" E 17°32'22"   | YL 23 |
| 67. Medvednica                    | N 45°53'20" E 15°58'33"   | WL 78 |
| 68. Milivojevci, Požega           | N 45°25' 40" E 17°31' 14" | YL 12 |
| 69. Metković-Gabela               | N 43°04'01" E 17°39'08"   | YH 16 |
| 70. Mikleuš                       | N 45°36'46" E 17°48'33"   | YL 15 |
| 71. Nard                          | N 45°39'51" E 18°28'49"   | CR 06 |
| 72. Nedelišće                     | N 46°22'34" E 16°23'08"   | XM 12 |
| 73. Nemetin                       | N 45°32'23" E 18°46'15"   | CR 24 |
| 74. Normanci                      | N 45°33'21" E 18°21'44"   | BR 94 |
| 75. Nova Gradiška                 | N 45°15'29" E 17°23'02"   | XL 81 |
| 76. Novigrad na Dobri             | N 45°28'19" E 15°26'31"   | WL 33 |
| 77. Ogulin                        | N 45°15'57" E 15°13'25"   | WL 11 |
| 78. Orahovica                     | N 45°31'44" E 17°52'49"   | YL 24 |
| 79. Oruda Island                  | N 44°33'07" E 14°34'57"   | VK 63 |
| 80. Osijek                        | N 45°33' 17" E 18°41' 43" | CR 24 |
| 81. Otok                          | N 45°08'47" E 18°53'02"   | CR 30 |
| 82. Palacol Island                | N 44°32'40" E 14°35'39"   | VK 63 |
| 83. Peščenica-Vratovo             | N 45°36'08" E 16°10'05"   | WL 95 |
| 84. Petrijevci                    | N 45°36'51" E 18°32'12"   | CR 05 |
| 85. Petrinja                      | N 45°25'31" E 16°14'48"   | WL 93 |
| 86. Pisulj Island                 | N 45°01'12" E 13°41'51"   | UK 99 |
| 87. Piškorevci                    | N 45°15'16" E 18°23'57"   | BR 91 |
| 88. Podolje                       | N 45°48'58" E 18°43'43"   | CR 27 |

|                                   |                           |       |
|-----------------------------------|---------------------------|-------|
| 89. Podravlje (Osijek)            | N 45°33'53" E 18°42'30"   | CR 24 |
| 90. Podravska<br>Moslavina        | N 45°47'07" E 17°58'55"   | YL 37 |
| 91. Poganovci                     | N 45°29'22" E 18°23'59"   | BR 94 |
| 92. Polonje, Sveti Ivan<br>Zelina | N 45°57'49" E 16°16'46"   | WL 99 |
| 93. Ponikve (Bakar)               | N 45°10'22" E 14°52'53"   | VL 61 |
| 94. Popovac                       | N 45°48'22" E 18°39'34"   | CR 17 |
| 95. Popovača                      | N 45°34'16" E 16°37'38"   | XL 24 |
| 96. Poreč                         | N 45°13'37" E 13°35'41"   | UL 90 |
| 97. Primišlje                     | N 45°10'55" E 15°28'22"   | WL 30 |
| 98. Pula                          | N 44°51'59" E 13°50'58"   | VK 16 |
| 99. Pulari Island                 | N 45°03'25" E 13°39'51"   | UK 99 |
| 100. Punta Križa                  | N 44°38'15" E 14°29'39"   | VK 54 |
| 101. Pušća                        | N 45°55'01" E 15°46'10"   | WL 68 |
| 102. Pušćine                      | N 46°21' 07" E 16°22'10"  | XM 03 |
| 103. Radovanci                    | N 45°30'67" E 17°39'43"   | YL 03 |
| 104. Rečica                       | N 45°30'27" E 15°39'46"   | WL 53 |
| 105. Revera Island                | N 45°03'02" E 13°39'34"   | UK 99 |
| 106. Rovinj                       | N 45°04'52" E 13°38'19"   | UK 99 |
| 107. Saborsko                     | N 45°02'29" E 15°19'16"   | WK 38 |
| 108. Senj                         | N 44°59'21" E 14°54'12"   | VK 98 |
| 109. Seona                        | N 45°28'24" E 18°01'28"   | BR 74 |
| 110. Sisak                        | N 45°29'06" E 16°22'23"   | XL 03 |
| 111. Skrad                        | N 45°25'45" E 14°54'54"   | VL 93 |
| 112. Slatinski Drenovac           | N 45°31'55" E 17°41'30"   | YL 14 |
| 113. Slunj                        | N 45°06'53" E 15°35'16"   | WK 49 |
| 114. Sljeme                       | N 45°53'57" E 15°56'51"   | WL 78 |
| 115. Sotin                        | N 45°17'46" E 19°05'48"   | CR 51 |
| 116. Spačva                       | N 45°03'15" E 19°01'48"   | CQ 38 |
| 117. Split                        | N 43°30'29" E 16°26'25"   | XJ 11 |
| 118. Srednja Posavina:<br>Stružec | N 45°31'37" E 16°32'59"   | XL 24 |
| 119. Stara Ves                    | N 45°58'35" E 16°29'56"   | XL 39 |
| 120. Stari Laz                    | N 45°21' 40" E 14°52' 39" | VL 92 |
| 121. Sturag Island                | N 45°03'05" E 13°37'34"   | UK 99 |
| 122. Sunger                       | N 45°19'21" E 14°49'11"   | VL 81 |
| 123. Sungerski Lug                | N 45°19'22" E 14°49'12"   | VL 81 |
| 124. Susak Island                 | N 44°30'28" E 14°18'14"   | VK 42 |
| 125. Sveti Đurađ                  | N 45°44'24" E 18°14'33"   | BR 86 |
| 126. Sveti Ivan Island            | N 45°02'49" E 13°37'17"   | UK 99 |
| 127. Sveti Ivan np reef           | N 45°02'33" E 13°36'50"   | UK99  |
| 128. Sveti Ivan Žabno             | N 45°56'43" E 16°36'20"   | XL 29 |
| 129. Sveti Petar Island           | N 44°27'43" E 14°33'29"   | VK 62 |
| 130. Široko Polje                 | N 45°24'14" E 18°28'20"   | CR 03 |
| 131. Školjić reef                 | N 44°38'09" E 14°13'54"   | VK 54 |
| 132. Tikveš                       | N 45°40'20" E 18°50'37"   | CR 36 |
| 133. Tompojevci                   | N 45°13'57" E 19°05'32"   | CR 41 |
| 134. Topoline                     | N 45°33'41" E 18°22'33"   | BR 84 |
| 135. Tovarjež Island              | N 45°10'07" E 13°34'55"   | UL 90 |
| 136. Trakošćan                    | N 46°15'32" E 15°56'48"   | WM 72 |
| 137. Unije Island                 | N 44°37'29" E 14°15'34"   | VK 34 |
| 138. Vele Srakane Island          | N 44°34'51" E 14°18'41"   | VK 42 |
| 139. Velika                       | N 45°27'20" E 17°39'45"   | YL 03 |
| 140. Velika Gorica                | N 45°42'51" E 16°04'30"   | WL 76 |

|                                                                             |                           |       |
|-----------------------------------------------------------------------------|---------------------------|-------|
| 141. Velika Kapela<br>mountain: Razvala                                     | N 45°04'35" E 15°12'41"   | WK 29 |
| 142. Velika Kopanica                                                        | N 45°09'21" E 18°23'40"   | BR 90 |
| 143. Veliki Piruzi reef                                                     | N 45°03'32" E 13°38'22"   | UK 99 |
| 144. Velika Sestrica<br>Island                                              | N 45°02'00" E 13°40'28"   | UK 99 |
| 145. Veštar Island                                                          | N 45°02'51" E 13°40'42"   | UK 99 |
| 146. Viljevo                                                                | N 45°45'05" E 18°03'48"   | BR 77 |
| 147. Vinkovci                                                               | N 45°17'16" E 18°48'20"   | CR 21 |
| 148. Visuć (Udbina)                                                         | N 44°31' 35" E 15°50' 07" | WK 63 |
| 149. Voćin                                                                  | N 45°37' 11" E 17°32' 40" | XL 95 |
| 150. Vrbanja                                                                | N 45°00' 1" E 18°51'09"   | CQ 38 |
| 151. Vrpolje                                                                | N 45°12'37" E 18°24'19"   | BR 90 |
| 152. Vukomeričke<br>Gorice: Prkovec                                         | N 45°37'00" E 15°56'59"   | WL 84 |
| 153. Vukovar                                                                | N 45°20'43" E 19°00'04"   | CR 42 |
| 154. Zadar                                                                  | N 44°07'11" E 15°13'59"   | WJ 18 |
| 155. Zagreb                                                                 | N 45°48'47" E 15°58'40"   | WL 77 |
| 156. Zagreb–Karlovac<br>–Sisak (Petrinja)<br>–Bjelovar (Gornja<br>Posavina) | -                         | WL 75 |
| 157. Zeča Island                                                            | N 44°46'20" E 14°18'41"   | VK 56 |
| 158. Zlatna Greda<br>(Kopački rit NP)                                       | N 45°43'16" E 18°51'49"   | CR 36 |
| 159. Zmajevac                                                               | N 45°47'59" E 18°48'23"   | CR 37 |
